# Supplementary material
Source: Elsevier journal article supplement (https://www.sciencedirect.com/science/article/pii/S1695403320301594)
Supplement: mmc2 [file S1695403320301594:mmc2.pdf]

## DIETA SIN GLUTEN

*FUENTES: Aegastro, Aedeseo, AEPNAA y [www.celiacos.org](http://www.celiacos.org)*

Durante la realización de la dieta, **evite comer fuera de casa** para tener un mejor control. En caso de comer fuera, intentar tomar alimentos frescos y evitar aquellos precocinados o con salsas preparadas.

**Dieta estricta de eliminación de gluten:** El gluten es una proteína que se encuentra en la **semilla de cereales como trigo, cebada, centeno y derivados y algunas variedades de avena**. Carece de valor nutricional, pero es el responsable de la elasticidad de la masa de harina, confiriendo la consistencia esponjosa de panes y masas horneados.

### Recomendaciones generales

- Es recomendable consumir productos **naturales** o genéricos, es decir, los que son libres de gluten por naturaleza.
- **No se recomienda consumir productos a granel** ya que son productos que tienen mayor riesgo de haber sufrido contaminación cruzada.
- Al adquirir productos elaborados y envasados es recomendable comprobar la relación de ingredientes que figuran en el etiquetado, o buscarlos en la lista de alimentos sin gluten de FACE o en la aplicación FACEmóvil.
- Se debe de extremar la precaución **en bares, restaurantes, y comedores**.
- En el domicilio se recomienda eliminar las harinas de trigo y el pan rallado con gluten y utilizar, en su lugar, harinas y/o pan rallado sin gluten, copos de puré de patata para rebozar, empanar o espesar salsas. De este modo los alimentos cocinados en casa podrían ser consumidos por todos
- Ante la duda de si un producto contiene o no gluten: **NO LO CONSUMA**
- La espiga barrada (Figura 1) es **el símbolo internacional sin gluten**. Aunque en la actualidad el etiquetado del gluten en los productos alimenticios ha mejorado, a menudo los pacientes se sorprenden al descubrir que los productos etiquetados “sin gluten” pueden contener hasta 20 mg de gluten por kg de producto (20 ppm) según establece el Reglamento Europeo (UE) Nº 828/2014 [219]. De hecho, un consumo excesivo de estos productos es, con frecuencia creciente, la causa de no obtener una mejoría clínica

Figura 1. Símbolo internacional sin gluten

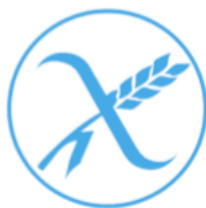

En relación al contenido en gluten los alimentos pueden clasificarse en libres de gluten, con posible contenido en gluten, y alimentos con gluten.

|                                     |                                                                                                                                                                                                                                            |                                                                                                                                                                                                             |                                                                                                                             |
|-------------------------------------|--------------------------------------------------------------------------------------------------------------------------------------------------------------------------------------------------------------------------------------------|-------------------------------------------------------------------------------------------------------------------------------------------------------------------------------------------------------------|-----------------------------------------------------------------------------------------------------------------------------|
|                                     | <b><i>ALIMENTOS LIBRES DE GLUTEN: Por su naturaleza no contienen gluten.</i></b>                                                                                                                                                           | <b><i>PUEDEN CONTENER GLUTEN: Por su elaboración pueden resultar contaminados o contener trazas de gluten</i></b>                                                                                           | <b><i>CONTIENEN GLUTEN: Contiene cereales con gluten o derivados. Alimentos elaborados artesanalmente y/o a granel.</i></b> |
| <b>Aceites y grasas comestibles</b> | <p>Aceites (todos los tipos)</p> <p>Grasas animales (manteca, sebo, tocino...)</p> <p>Mantequilla tradicional</p> <p>Margarina sin fibra</p>                                                                                               | <p>Mantequillas fáciles de untar</p> <p>Mantequillas ligeras (40% de grasas) y margarinas con fibra</p>                                                                                                     |                                                                                                                             |
| <b>Alimentos infantiles</b>         | <p>Leches para lactantes (leche 1), leches de continuación (leche 2), leches de crecimiento (leche 3).</p> <p>Tarritos de inicio (que no lleven como ingrediente almidón)</p>                                                              | <p>Papillas y tarritos</p>                                                                                                                                                                                  | <p>Papillas de cereales con gluten</p>                                                                                      |
| <b>Aperitivos</b>                   | <p>Olivas con y sin hueso o rellenas de anchoa o pimiento envasadas sin aliño</p> <p>Encurtidos: pepinillos, alcaparras, cebolletas, altramuces, etc. (sin aromas ni especias)</p> <p>Palomitas de maíz envasadas (maíz, aceite y sal)</p> | <p>Aceitunas y encurtidos aliñados</p> <p>Aperitivos de arroz, maíz y patata</p> <p>Cortezas y torreznos</p> <p>Maíz (kikos, pepes, etc.)</p> <p>Otros aperitivos</p> <p>Palomitas de maíz</p> <p>Pipas</p> |                                                                                                                             |

## ESOFAGITIS EOSINOFILICA. DIETAS

|                                      |                                                                                                                                                                                                                                                                                                                                                                                                                                                                                                                           |                                                                                                                                                                                                                        |                                        |
|--------------------------------------|---------------------------------------------------------------------------------------------------------------------------------------------------------------------------------------------------------------------------------------------------------------------------------------------------------------------------------------------------------------------------------------------------------------------------------------------------------------------------------------------------------------------------|------------------------------------------------------------------------------------------------------------------------------------------------------------------------------------------------------------------------|----------------------------------------|
| <b>Azúcares y Edulcorantes</b>       | Almíbar<br>Azúcar blanco, moreno y panela<br>Edulcorantes<br>Fructosa y glucosa<br>Miel y melazas<br>Sirope de agave                                                                                                                                                                                                                                                                                                                                                                                                      | Azúcar en polvo, glass o glacé y aromatizados                                                                                                                                                                          |                                        |
| <b>Bebidas</b>                       | Achicoria<br>Gaseosa, sifón y sodas<br>Néctares, mostos y zumos<br>Refrescos: naranja, limón, cola, lima, manzana, tónica, bitter y gaseosa<br>Refrescos: light, sin azúcar, sin cafeína y bebidas de té con sabores<br>Infusiones de hierbas naturales sin aromas<br>Aguas embotelladas (naturales, minerales, con o sin burbujas)<br>Café sin aromas u otros ingredientes (naturales, descafeinados, torrefactos, grano, molidos, solubles, instantáneos y cápsulas)<br>Vino (tinto, blanco, rosado) anís, ron, ginebra | Bebidas de café/sucedáneos de café<br>Bebidas isotónicas y energéticas<br>Cervezas sin/con alcohol<br>Horchatas<br>Infusiones con aromas<br>Bebidas combinadas<br>Licores<br>Sangría                                   | Cervezas (excepto marcas certificadas) |
| <b>Cacaos y Chocolates a la Taza</b> | Cacao puro y cacao puro en polvo azucarado<br>Pasta de cacao y manteca de cacao                                                                                                                                                                                                                                                                                                                                                                                                                                           | Cacao en polvo (con harina y con harina azucarado) y crema de cacao<br>Chocolates solubles, instantáneos y a la taza<br>Bombones, trufas, chocolates<br>Productos de confitería (conguitos, marrón glacé, yemas, etc.) |                                        |

|                                       |                                                                                                                                                                                                                                                                                                                                |                                                                                                                                                                                                                                                                                                                                                                                                                                                                                                                                                                                                                                                                                  |                                                                                                                                                                                                       |
|---------------------------------------|--------------------------------------------------------------------------------------------------------------------------------------------------------------------------------------------------------------------------------------------------------------------------------------------------------------------------------|----------------------------------------------------------------------------------------------------------------------------------------------------------------------------------------------------------------------------------------------------------------------------------------------------------------------------------------------------------------------------------------------------------------------------------------------------------------------------------------------------------------------------------------------------------------------------------------------------------------------------------------------------------------------------------|-------------------------------------------------------------------------------------------------------------------------------------------------------------------------------------------------------|
| <b>Cereal y Pseudocereal</b>          | <p>Siempre que se encuentren en grano.</p> <ul style="list-style-type: none"> <li>• Arroz</li> <li>• Maíz</li> <li>• Quinoa</li> <li>• Amaranto</li> <li>• Mijo</li> <li>• Sorgo</li> <li>• Teff</li> <li>• Trigo sarraceno/alforfón</li> </ul>                                                                                | <p>Ver: Productos especiales “sin gluten” para celíacos</p>                                                                                                                                                                                                                                                                                                                                                                                                                                                                                                                                                                                                                      | <p>Cereales para el desayuno de malta, extractos de malta y jarabes de malta</p> <p>Trigo</p> <p>Espelta</p> <p>Cebada</p> <p>Centeno</p> <p>Triticale</p> <p>Avena (excepto marcas certificadas)</p> |
| <b>Embutidos y Productos Cárnicos</b> | <p>Carne y vísceras, frescas, congeladas en conserva sin cocinar</p> <p>Cecina y tocino</p> <p>Jamón cocido, sólo calidad extra</p> <p>Jamón y paleta curados (tipo jabugo, serrano, etc.)</p> <p>Panceta y lacón frescos, salados o curados</p> <p>Salazones y salmueras: lacón, costillas, orejas, manos y rabos salados</p> | <p>Albóndigas</p> <p>Bacon y pancetas</p> <p>Barbacoas, brochetas, pinchos y parrilladas</p> <p>Butifarra, chistorra, morcilla, longaniza, chorizo, salchichas</p> <p>Chopped (cerdo y pavo), salchichón, fuet, jamón york, salami, mortadela, lomo</p> <p>Hamburguesas y carne picada</p> <p>Jamones, codillos y paletas cocidas (ahumadas, cocidas, al horno, tipo Sajonia, York)</p> <p>Lomos (adobados, ahumados, al horno, cintas de lomo, cocidos, curados, tipo Sajonia)</p> <p>Otros productos cárnicos (adobados, preparados, surtidos, etc.)</p> <p>Patés</p> <p>Productos del cerdo, ciervo, jabalí, pato, pavo, pollo</p> <p>Sobrasadas</p> <p>Surtidos y tablas</p> |                                                                                                                                                                                                       |

## ESOFAGITIS EOSINOFILICA. DIETAS

|                                            |                                                                                                                                                                                                                                                                                                                                                                                    |                                                                                                                                                                      |                                                                                                                                                          |
|--------------------------------------------|------------------------------------------------------------------------------------------------------------------------------------------------------------------------------------------------------------------------------------------------------------------------------------------------------------------------------------------------------------------------------------|----------------------------------------------------------------------------------------------------------------------------------------------------------------------|----------------------------------------------------------------------------------------------------------------------------------------------------------|
| <b>Especias, Condimentos y Sazonadores</b> | <p>Colorantes y aromas naturales en rama, hebra y grano (envasadas sin procesar). Ej: azafrán, canela en rama o vainas de vainilla. Nunca a granel.</p> <p>Especias y hierbas naturales en rama, hebra y grano (envasadas sin procesar). Ej: pimienta, perejil, canela, nuez moscada, orégano, etc. Nunca a granel.</p> <p>Sal</p> <p>Vinagre de manzana, Módena, vino o sidra</p> | <p>Condimentos y sazónadores</p> <p>Especias (procesadas)</p> <p>Pimentón</p>                                                                                        |                                                                                                                                                          |
| <b>Frutas y Derivados</b>                  | <p>Frutas al natural</p> <p>Mermeladas, confituras y cremas dulces</p> <p>Conservas de fruta en almíbar, compota y en su jugo</p> <p>Frutas desecadas: albaricoques, bayas de Goyi, dátiles, orejones, pasas y ciruelas</p> <p>Frutas confitadas</p>                                                                                                                               | Jaleas, carnes y dulces de membrillo                                                                                                                                 |                                                                                                                                                          |
| <b>Frutos Secos</b>                        | Frutos secos crudos con o sin cáscara (enteros)                                                                                                                                                                                                                                                                                                                                    | <p>Crema de frutos secos</p> <p>Barritas de frutos secos</p> <p>Frutos secos fritos y/o tostados con y sin sal</p> <p>Harinas de frutos secos</p> <p>Higos secos</p> |                                                                                                                                                          |
| <b>Golosinas</b><br><b>Helados</b>         | <p>Caramelos duros tipo cristal</p> <p>Helados de agua (ej: polos de limón, naranja, cola, etc.)</p> <p>Regaliz de palo</p>                                                                                                                                                                                                                                                        | <p>Caramelos, gominolas</p> <p>Chicles</p> <p>Otras golosinas (flag o flas, surtidos, etc.)</p> <p>Granizados</p>                                                    | <p>Todo tipo de golosinas a granel</p> <p>Helados a granel o aquello en los que no se puede comprobar sus ingredientes</p> <p>Helados con barquillo,</p> |

|                                                     |                                                                                                                                                                                                                                                                                                                                                                                                                                                                                                                                                                                                                                                                                                                   |                                                                                                                                                                                                                                                                                                                                                                                                                                                                                                                                                                                                                                                                                              |                                                            |
|-----------------------------------------------------|-------------------------------------------------------------------------------------------------------------------------------------------------------------------------------------------------------------------------------------------------------------------------------------------------------------------------------------------------------------------------------------------------------------------------------------------------------------------------------------------------------------------------------------------------------------------------------------------------------------------------------------------------------------------------------------------------------------------|----------------------------------------------------------------------------------------------------------------------------------------------------------------------------------------------------------------------------------------------------------------------------------------------------------------------------------------------------------------------------------------------------------------------------------------------------------------------------------------------------------------------------------------------------------------------------------------------------------------------------------------------------------------------------------------------|------------------------------------------------------------|
|                                                     |                                                                                                                                                                                                                                                                                                                                                                                                                                                                                                                                                                                                                                                                                                                   | Helados                                                                                                                                                                                                                                                                                                                                                                                                                                                                                                                                                                                                                                                                                      | bizcocho, galleta y/o obleas (excepto marcas certificadas) |
| <b>Hortalizas, Verduras, Tubérculos y Derivados</b> | <p>Hortalizas, verduras y tubérculos deshidratados, frescos, congelados, cocidos y/o en conserva al natural</p> <p>Ensaladas y ensaladillas frescas, congeladas o cocidas de hortalizas, verduras y pescado (sin cocinar)</p> <p>Hongos y setas frescas y/o envasadas al natural</p>                                                                                                                                                                                                                                                                                                                                                                                                                              | <p>Hortalizas, verduras y tubérculos cocinados (parrilladas, braseados) para saltar, etc.</p> <p>Ensaladas y ensaladillas de hortalizas, verduras tubérculos, con quesos, sucedáneos de marisco, salsas, etc.</p> <p>Patatas prefritas congeladas</p> <p>Harinas de tubérculos</p>                                                                                                                                                                                                                                                                                                                                                                                                           |                                                            |
| <b>Huevos</b>                                       | Huevos frescos, deshidratados y líquidos                                                                                                                                                                                                                                                                                                                                                                                                                                                                                                                                                                                                                                                                          |                                                                                                                                                                                                                                                                                                                                                                                                                                                                                                                                                                                                                                                                                              |                                                            |
| <b>Lácteos y productos lácteos</b>                  | <p>Cuajada fresca, natural, cuajo, requesón y kéfir</p> <p>Leche fresca (esterilizada o pasteurizada UHT), evaporada, condensada, concentrada, etc. (enteras o desnatadas)</p> <p>Leches enriquecidas con sales minerales (calcio, fósforo, flúor,) y vitaminas</p> <p>Leches fermentadas y leches fermentadas líquidas naturales (sin aromas, aditivos, sabores o frutas)</p> <p>Yogures naturales (enteros, desnatados, enriquecidos, azucarados, bifidos, con carotenos y con vitaminas)</p> <p>Yogur Griego (natural)</p> <p>Nata (excepto nata para cocinar)</p> <p>Quesos frescos con o sin lactosa, enteros, cuña o media cuña (tipo blanco pasteurizado natural, Burgos, Quark, Mozzarella, Villalón,</p> | <p>Batidos</p> <p>Bebidas de soja</p> <p>Leches fermentadas y leches fermentadas líquidas</p> <p>Nata para cocinar</p> <p>Postres (postres lácteos de larga duración, flanes, natillas, arroz con leche, crema catalana y mousses)</p> <p>Preparados lácteos</p> <p>Quesos de untar con sabores, tipo sándwich, preparados lácteos, en porciones, lonchas, rallados, etc.</p> <p>Quesos frescos con sabores, tipo petit, etc.</p> <p>Sustitutos lácteos: postres de soja, bebidas de arroz, cremas de almendras, etc.</p> <p>Yogures aromatizados de sabores (enteros, semis y desnatados)</p> <p>Yogures y preparados lácteos (pasteurizados, pasteurizados después de la fermentación,</p> | Yogures con cereales                                       |

## ESOFAGITIS EOSINOFILICA. DIETAS

|                                       |                                                                                                                                                                                                                                                                                                                     |                                                                                                                                                                                        |                                                                                                                                        |
|---------------------------------------|---------------------------------------------------------------------------------------------------------------------------------------------------------------------------------------------------------------------------------------------------------------------------------------------------------------------|----------------------------------------------------------------------------------------------------------------------------------------------------------------------------------------|----------------------------------------------------------------------------------------------------------------------------------------|
|                                       | <p>requesón, etc.)</p> <p>Quesos tiernos fermentados, curados o semicurados, con o sin lactosa, enteros, cuña, media cuña o lonchas (Brie, Camembert, Cheddar, queso de bola, Edam, Emmental, Gouda, Gruyère, Manchego, Mascarpone, Parmesano, Torta del casar, queso azul, etc.)</p> <p>Queso de cabra en rulo</p> | con frutas, zumos con fibra                                                                                                                                                            |                                                                                                                                        |
| <b>Legumbres</b>                      | <p>Legumbres y leguminosas secas (no granel): alubias, garbanzos, lentejas, soja, etc. (revisar que no contengan granos de trigo)</p> <p>Legumbres en conserva cocidas o precocinadas “al natural”(en el caso de las lentejas revisar siempre el etiquetado ya que pueden contener granos de trigo)</p>             | <p>Harinas de legumbres</p> <p>Legumbres cocinadas (fabadas, cocidos, etc.)</p>                                                                                                        |                                                                                                                                        |
| <b>Levaduras</b>                      | <p>Impulsores o gasificantes (bicarbonato sódico, ácido tartárico, sal de seltz y sal de frutas)</p> <p>Levadura fresca de panadería (<i>Saccharomyces cerevisiae</i>) en bloques o pastillas</p>                                                                                                                   | Levadura deshidratada (en polvo o granulada) y extractos de levadura                                                                                                                   |                                                                                                                                        |
| <b>Harinas y derivados</b>            |                                                                                                                                                                                                                                                                                                                     | <p>Harinas de cereales permitidos (Ver: Productos especiales “sin gluten” para celíacos)</p> <p>Harinas de frutos secos</p> <p>Harinas de legumbres</p> <p>Harinas de tubérculos</p>   | Harina, almidones, sémolas y derivados: trigo, cebada, centeno, triticale y avena (en el caso de la avena excepto marcas certificadas) |
| <b>Pescados, Mariscos y Derivados</b> | <p>Conservas de pescado/marisco (al natural, ajillo, aceite)</p> <p>Pescados y mariscos frescos, cocidos, congelados sin rebozar, ahumados, salados o desecados (salmón, trucha,</p>                                                                                                                                | <p>Albóndigas/hamburguesas de pescado</p> <p>Conservas de pescado/marisco (en salsa, escabeche, con tomate, embutidas, etc.)</p> <p>Paté de pescado</p> <p>Sucedáneos de pescado y</p> | Pescados rebozados o empanados (excepto marcas certificadas)                                                                           |

|                                                              |                                                                                                                  |                                                                                                                                                                                                                                                                                                                                                                                                                                                  |  |
|--------------------------------------------------------------|------------------------------------------------------------------------------------------------------------------|--------------------------------------------------------------------------------------------------------------------------------------------------------------------------------------------------------------------------------------------------------------------------------------------------------------------------------------------------------------------------------------------------------------------------------------------------|--|
|                                                              | <p>bacalao, etc.)</p> <p>Ensaladillas de pescado con hortalizas (sin cocinar)</p>                                | <p>marisco (gulas, palitos de cangrejo, surimi, etc.)</p>                                                                                                                                                                                                                                                                                                                                                                                        |  |
| <p><b>Postres y Preparados para postres y repostería</b></p> | <p>Gelatina neutra</p> <p>Coco rallado</p> <p>Cola de pescado (láminas)</p> <p>Agua de Azahar</p>                | <p>Postres de gelatina</p> <p>Tartas y mousses</p> <p>Aromas (vainilla, fresa, etc.)</p> <p>Azúcar en polvo glass o glacé y aromatizados (Ver: Azúcares y edulcorantes)</p> <p>Coberturas de chocolate (Ver: Chocolates, bombones y confitería)</p> <p>Fideos de chocolate, estrellas de colores, colorantes alimentarios, fondant, etc.</p> <p>Preparados en polvo para flan, gelatinas, natillas, etc.</p> <p>Siropes y caramelos líquidos</p> |  |
| <p><b>Productos Dietéticos, suplementos y sustitutos</b></p> | <p>Jalea real</p> <p>Polen en gránulos</p> <p>Aceite de germen de trigo</p> <p>Lecitina de soja</p>              | <p>Barritas energéticas (sin cereales)</p> <p>Bebidas de sales minerales, fibras vegetales y complementos alimentarios</p> <p>Complementos dietéticos</p> <p>Fibras vegetales</p> <p>Levadura de cerveza</p> <p>Nutrición deportiva</p> <p>Suplementos alimenticios para niños</p>                                                                                                                                                               |  |
| <p><b>Purés y cremas</b></p>                                 | <p>Puré de verduras/hortalizas/tubérculos (sin añadidos)</p>                                                     | <p>Purés y cremas</p>                                                                                                                                                                                                                                                                                                                                                                                                                            |  |
| <p><b>Salsas</b></p>                                         | <p>Tinta de calamar (tinta de calamar/sepia/cefalópodo, sal y agua)</p> <p>Tomate natural (entero/triturado)</p> | <p>Salsas preparadas.: Barbacoa Ketchup. Mostazas</p> <p>Mayonesas, ligeras y aliolis</p> <p>Salsas preparadas. Tomate, tomate frito y tumaca</p> <p>Salsas preparadas. Variadas:</p>                                                                                                                                                                                                                                                            |  |



## ESOFAGITIS EOSINOFILICA. DIETAS

|                                   |                                       |                                                                 |                                                                                                                                         |
|-----------------------------------|---------------------------------------|-----------------------------------------------------------------|-----------------------------------------------------------------------------------------------------------------------------------------|
|                                   |                                       | tipos boloñesa, brava.. etc.                                    |                                                                                                                                         |
|                                   |                                       | Salsas preparadas. Veganas                                      |                                                                                                                                         |
| <b>Sopas y pastillas de caldo</b> | Sopa de verduras (sin añadidos)       | Pastillas de caldo                                              |                                                                                                                                         |
|                                   |                                       | Sopas, consomés y caldos                                        |                                                                                                                                         |
|                                   |                                       | Sopas deshidratadas                                             |                                                                                                                                         |
| <b>Otros</b>                      | Garrofin (E410)                       | <b>Precocinados (platos preparados precocinados congelados)</b> | <b>Productos de consumo navideños</b>                                                                                                   |
|                                   | Goma guar (E412)                      |                                                                 | <ul style="list-style-type: none"> <li>• Roscones de Reyes</li> <li>• Mantecadas</li> <li>• Mantecados</li> <li>• Polvorones</li> </ul> |
|                                   | Goma arábica (E414)                   | <b>Tortitas de tacos, fajitas y quesadilla</b>                  |                                                                                                                                         |
|                                   | Agar agar                             |                                                                 |                                                                                                                                         |
|                                   | Goma xantana                          |                                                                 | Germen de trigo                                                                                                                         |
|                                   | Tofu (ingredientes: soja, agua y sal) |                                                                 | Salvado de trigo                                                                                                                        |
