# Supplementary material
Source: Elsevier journal article supplement (https://www.sciencedirect.com/science/article/pii/S1695403320301594)
Supplement: mmc4 [file S1695403320301594:mmc4.pdf]

## DIETA SIN PROTEÍNAS DE LECHE DE VACA (PLV)

*FUENTES: Aegastro, Aedeseo y AEPNAA*

**Dieta estricta de eliminación de leche, derivados y productos que la contengan (PLV: proteína de leche de vaca).** Excluyendo también leche de cabra, búfala y oveja, ya que por la similitud de sus proteínas, puede producir reacción cruzada.

Durante la realización de la dieta, **evite comer fuera de casa** para tener un mejor control. En caso de comer fuera, intentar tomar alimentos frescos y evitar aquellos precocinados o con salsas preparadas (p.ej, pescados y carnes a la plancha, ensaladas, fruta, etc.), teniendo especial cuidado con alimentos cocinados, embutidos, patatas fritas hechas en freidoras que se utilizan para freír croquetas o empanadillas, salsas, purés o cremas, etc. . Ya que podrían contener leche.

La comida más limitada es el desayuno, podrá consumir bebidas vegetales (soja, almendra...), y también zumos naturales de fruta. Si la dieta es muy estricta su médico puede recomendarle algunas **fórmulas elementales o especiales** para completar su nutrición.

Se debe prestar **atención rigurosa al etiquetado de los alimentos**, teniendo en cuenta que podemos encontrar leche como alérgeno oculto. Las PLV se encuentran en lácteos y derivados, pero también están presentes en otros productos manufacturados como **pan, fiambres, embutidos, pescados congelados, golosinas, conservas y medicamentos. Numerosos aditivos empleados en la industria proceden de la leche.**

### **EVITAR productos que contengan:**

Leche y derivados (vaca, oveja, cabra)  
Caseína  
Caseinatos cálcico (E-4511), sódico (E-4512), potásico (E-4513)  
Lactoalbúmina  
Globulina, lactoglobulina  
Lactoferrina  
Suero lácteo, suero en polvo  
Solidificante  
Hidrolisatos  
Leche de mamíferos  
Lactosa

### **EVITAR etiquetas que contengan:**

Caldo Deshidratados  
Grasas animales sin especificar, grasa de manteca  
Proteínas, sin especificar  
Aromas, sin especificar  
...ya que pueden derivar de PLV  
Saborizante natural, de caramelo  
Colorante de caramelo

### **ALIMENTOS PERMITIDOS (vigilar etiquetado)**

Consumir preferiblemente **alimentos frescos**, como:

- Verduras y hortalizas: fresca o congelada al natural, cocinada o en ensalada.
- Arroz: paella, cocido con salsa de tomate casera.
- Quínoa, maíz, alforfón / trigo sarraceno, sorgo, mijo, amaranto, teff
- Patatas cocidas, asadas, fritas en aceite. Patatas de bolsa vigilando etiquetado.
- Pasta como macarrones, fideos, spaguetis...
- Bebidas: Infusiones (sin PLV), bebidas de soja, almendras y zumos de fruta
- Legumbres: lentejas, garbanzos, judías, guisantes, soja, con arroz o en ensalada.
- Carne: pollo, pavo, ternera, ternasco, cerdo (*excepto productos manufacturados, salchichas, hamburguesas, morcilla, etc*)
- Pescado y marisco (*excepto preparados como pescados precocinados, surimis.*)
- Huevo y todos los preparados que lo contengan.
- Aceite de oliva, girasol, maíz
- Margarina vegetal (comprobar que no lleva leche)
- Mermelada casera.
- Pan y galletas, comprobando la etiqueta que no contengan leche.
- Jamón serrano y lomo, de piezas enteras (evitar loncheados con conservantes).
- Jamón cocido de calidad extra (vigilar etiquetado siempre)
- Fruta fresca.
- Frutos secos.
- Chocolate negro sin leche

### **ALIMENTOS PROHIBIDOS**

Como regla general, se deben evitar todos aquellos alimentos de los que no se tenga la certeza que **NO** contienen **leche o trazas de leche**.

#### **DEBE EVITAR:**

- Leche de vaca natural o manufacturada (embotellada o en brick), así como en polvo, descremadas, condensadas, evaporadas, leches para lactancia, etc.
- Productos lácteos: yogures, natillas, flanes, quesos, requesón, quesitos, arroz con leche, mantequilla, helados, cuajada, batidos, etc.
- Productos elaborados con bechamel (croquetas, lasaña,..). Se puede hacer la bechamel con bebida de soja o arroz.
- Productos que contienen leche en alguna cantidad: -Galletas, magdalenas, pasteles, repostería, pastelitos (DONUTS®...)
- Chocolates CON leche, caramelos CON leche (SUGUS® y similares).
- Margarinas con leche (Tulipan®, Vita®...).
- Cremas de Cacao (NOCILLA® y similares).
- Embutidos (chorizo, salchichón, mortadela, sobrasada, longaniza...) y Jamón de York (solo permitido de calidad EXTRA)
- Todos los productos realizados con leche de cabra y oveja, por la similitud con las proteínas de la leche de vaca.
- Ingredientes como "proteínas" y "aromas" sin especificar.

## **RECURSOS:**

Existen recursos y aplicaciones para la consulta de ingredientes y productos aptos para dietas exentas de proteínas de leche animal como son:

### Aplicaciones

- Bueno para mí! App. Aplicación para identificar alérgenos de declaración obligada y otros, mediante escáner de código de barras. Gratuito. No es necesario registro del usuario. Reconoce únicamente productos de venta en España. Información disponible en: <http://www.buenoparami.com>. Aplicación disponible en: <https://play.google.com>
- ¿Qué puedo comer? App. Información de ingredientes y nutricional de más de 100.000 productos comercializados en España. Disponible en: <https://play.google.com>
- Ask Allergies. Tarjetas de viaje. Aplicación para informar en diferentes idiomas de las alergias alimentarias. Disponible en: <https://play.google.com>

## **MEDICAMENTOS**

En los medicamentos que incluyen lactosa como excipiente (Lactitol E966), el sistema de obtención de lactosa podría marcar la diferencia, ya que la contaminación por PLV se podría dar cuando la lactosa fuera de origen animal, pero no si la lactosa es de síntesis. Verificar con el farmacéutico si el tratamiento farmacológico es adecuado para dietas exentas de PLV.

El Ministerio de Sanidad a través de su Agencia Española de Medicamentos y productos sanitarios ofrece un centro de información online dónde se pueden conocer toda la información sobre un medicamento.
