# Supplementary material
Source: Elsevier journal article supplement (https://www.sciencedirect.com/science/article/pii/S1695403320301594)
Supplement: mmc5 [file S1695403320301594:mmc5.pdf]

## DIETA SIN LEGUMBRES

*FUENTES: Aegastro, Aedeseo y AEPNAA*

Durante la realización de la dieta, **evite comer fuera de casa** para tener un mejor control. En caso de comer fuera, intentar tomar alimentos frescos y evitar aquellos precocinados o con salsas preparadas.

Los alergenicos de las leguminosas son más potentes cocinados. Las legumbres sometidas a cocción no sólo conservan la alergenicidad, sino que la aumentan

### **Evitar en la dieta:**

- Lentejas
- Garbanzos
- Judías (blancas, pintas y verdes)
- Soja
- Guisantes
- Altramuces
- Habas
- Algarroba
- Pistacho, helado de pistacho
- Cacahuete.
- Edamame
- Otras: Alfalfa, Frijoles, Bálsamo de Perú, Sen, Tamarindo, Arbol del amor.

### **Puede contener legumbre:**

#### **Cuidado revisar**

- Salsa de soja, tamari, shoyu...
- Tempeh, tofu, miso, natto...
- Derivados soja (queso, yogurt..)
- Bebida de Soja
- Humus y variedades
- Proteína vegetal texturizada
- Productos cocina asiatica
- Proteína vegetal
- Algunos productos celiacos (\*)
- Reposteria
- Smoothies

*(\*) Revisar etiquetado de productos para celíacos, ya que muchos están hechos con harina de legumbres.*

La legumbre se utiliza también como espesantes y estabilizantes en alimentos envasados: **Goma Arábica E-414, Traganto E-413, Guar E-412, Algarrobo o Garrofín E-410.**

Además se utilizan gomas vegetales de leguminosas **en la industria alimentaria:** Goma Arábica, Traganto, Garrofín, Guar; y en **la industria farmacéutica:** Goma Arábica, Guar; *(REVISAR ETIQUETADOS)*
